# Supplementary material
Source: publisher site journal article supplement (https://static.cambridge.org/content/id/urn:cambridge.org:id:article:S175173111900082X/resource/name/S175173111900082Xsupp001.xls)
Supplement: Supplementary file 1 [file S175173111900082Xsupp001.xls]

## Sheet: Supplementary file
NoGonderandBDMerged	NoGonderandBDseparate	Site	FarmName	AverageDMYC	AveragelactlengthinMonth	AveragevalueofaliterofmilkinETB	HayGari	HaycowdayinEkif	Costofhaycowday	NugCakeBrewerybyproduct	Wheatbran	Byproductsaftermill	StrawBeanandothercerealbyproducts	Totalfeedcostcowday	Labourusedfamily1hired2both3	Costofhieredlabourmonth	Costoffeedingforemployedlabourerpermonth	Costoflabor	Experienceofmastitisinthelastoneyear	Noofclinicallymastiticcows	Noofquartersaffected	Willingtopaytogetacowtreated	VetserviceBycallingvet1fromPublicservice23Both4self	If1VetservicecosttoRxaquarter	DrugcostforRxofaquarter	HowlongittakestotakeandreturnaCMcowtoandfromVetclinicforRxinmin	DoyoumilkacowinRxformastitisY1N0	DoyoumilkacowinRxmastitisY1N0	Indicatorfordiscardedmilk	HowlongUdontmilkmastitisQuarterIndays	HowlongUdontmilkthecow	Ifyeswhatistheuseofthemilkforhuman1tofeedcalves2discard3tofeeddo	Believewhetheramastiticcowreducesmilk0NeverNotsignificant1substa	IfreducethereductionpercowperdayInLitere	Indicator	MilkreductioncowmilkingInLitere	HolongMilkremainreduced	HowlongthemilkremainreducedIndays	DoesequivalentmilkyieldregainedafteracowcureYes1No0	DidyoucullcowsbecauseofunfittingformilkproductionY1N0	IfyeswhatismaincauseofcullingMastitis1Age2feedproblem3space4Sele	No.ofcowsyouculledbsofmastitisinthelasttwoyrs	Mostlikelypriceofacowculledduetomastitis	Mostlikelypriceofasimilarmastitisfreecowforreplacement	Herdsize	Nomilkingcows	NCMT1f	NCMT1h	NCMT2f
1.	1.	Gondar	Tesfa Yigzaw	6.	11.	12.	Ok	Ok	12.	4.	9.	0.	0.	25.3	3.	300.	1000.	1300.	0.	0.	0.		2.			30.						1.	0.							0.			5000.	15000.	4.	2	1.	1.	2.
2.	2.	Gondar	Surafael	6.	10.	12.	Ok	Ok	30.	0.	24.	0.	4.	57.5	3.	200.	1500.	1700.	1.	1.	1.	20.	3.	86.	35.	240.	0.	0.	Cow		5.	2.	2.	1.	Kg	1.	20.	20.	1.	0.					3.	2	0.	0.	0.
3.	3.	Gondar	Ayelign	8.	11.	12.	Ok	Ok	20.	6.	0.	0.	6.	31.5	3.	250.	700.	950.	1.	2.	2.		1.	200.			1 Except affected teat	1.	Quarter	5.		1.	2.	3.	Kg	3.	Forever	330.	0.	0.					4.	2	1.	0.	1.
4.	4.	Gondar	Habtamu	8.	9.	12.	Ok	Ok	12.	5.	0.	0.	6.	23	3.	250.		250.	1.	1.	1.		4.		75.		1 Except affected teat	1.	Quarter	3.				1.	Kg	1.	3.	3.							4.	4	1.	3.	3.
5.	6.	Gondar	Enkuayehush/Ayelign Fetene	8.	8.	12.	Ok	Ok	30.	4.	0.	0.	3.	36.940000000000005	3.	200.	600.	800.	0.	0.	0.		1.											0.											4.	2	4.	4.	0.
6.	7.	Gondar	Shegaw Geletew	13.	9.	12.	Ok	Ok	15.	12.	0.	0.	4.	31.1	1.			0.	1.	1.	1.		4.		80.		0.	0.	Cow		3.		3.	0.	Kg	0.	Forever	270.	0.	0.					1.	1	2.	2.	0.
7.	8.	Gondar	Misganaw	14.	12.	12.	Ok	Ok	0.	0.	0.	0.	35.	35	1.			0.	1.	1.	1.		4.		30.		0.	0.	Cow		3.	2.	1.	3.	Kg	3.	Forever	375.	0.	0.	1.				3.	3	0.	1.	1.
8.	9.	Gondar	Zewdu Seifu	8.	10.	12.	Ok	Ok	25.	6.	0.	0.	2.	32.75	3.	250.	1000.	1250.	1.	2.	4.		3.	150.		90.	1 Except affected teat	1.	Quarter	3.				0.	Kg	0.	7.	7.							3.	2	1.	1.	0.
9.	10.	Gondar	Dkula	20.	10.	12.	Ok	Ok	5.	30.	0.	0.	25.	60	1.			0.	1.	2.	4.		1.	200.			1 Except affected teat	1.	Quarter	5.		3.	1.	0.6	P	1.	7.	7.	1.	1.	1.				5.	3	2.	3.	0.
10.	11.	Gondar	Dagnew Jembere	10.	8.	12.	Ok	Ok	15.	1.	0.	0.	6.	22	3.	400.	600.	1000.	0.	0.	0.		1.									3.	1.												4.	4	0.	0.	0.
11.	12.	Gondar	Bitew Beyene	10.	9.	10.	Ok	Ok	30.	0.	4.	0.	25.	59	3.		600.	600.	0.	0.	0.		2.										1.	3.						1.	1.				3.	2	0.	2.	0.
12.	13.	Gondar	Getahun Gebrie	11.	10.	12.	Ok	Ok	25.	3.	0.	0.	4.	32.33	2.	600.		600.	1.	2.	4.		4.		80.		1 Except affected teat	1.	Quarter	3.				2.	Kg	2.	7.	7.							3.	2	0.	3.	0.
13.	14.	Gondar	Adugna Abebe	14.	6.	10.	Ok	Ok	11.	2.	0.	0.	4.	17.36	3.	400.	700.	1100.	0.	0.	0.		2.			90.						4.	1.	2.						0.					4.	1	2.	1.	0.
14.	15.	Gondar	Masresha Mequanint	11.	9.	10.	Ok	Ok	10.	4.	0.	0.	4.	18.100000000000001	1.			0.	1.	1.	1.		3.	200.	40.	120.	1 Except affected teat	1.	Quarter	3.		1.	1.	2.	Kg	2.	3.	3.	1.	0.					3.	1	0.	1.	2.
15.	16.	Gondar	Genetu Tsehay	12.	11.	11.	Ok	Ok	25.	8.	0.	0.	0.	32.700000000000003	1.			0.	0.	0.	0.		2.			30.						2.	3.	3.						0.					2.	2	1.	0.	0.
16.	17.	Gondar	Mulubrhan	10.	14.	10.	Ok	Ok	5.	4.	4.	0.	8.	20.14	3.	300.	700.	1000.	0.	0.	0.		3.			60.						1.	3.	4.						1.	4.				9.	3	1.	2.	0.
17.	18.	Gondar	Tamrat Asmelash	11.	8.	12.	Ok	Ok	11.	3.	2.	0.	2.	17.8	3.	350.	700.	1050.	1.	1.	1.		4.		60.	30.	1 Except affected teat	1.	Quarter	6.		4.	1.	1.	Kg	1.	7.	7.	1.	0.					4.	3	0.	2.	0.
18.	20.	Gondar	Kasanesh	7.	7.	12.	Ok	Ok	20.	4.	0.	0.	5.	29.23	3.	120.	500.	620.	0.	0.	0.		2.									2.	1.	4.						0.					3.	3	4.	3.	0.
19.	21.	Gondar	Nigussie G/mariam	14.	8.	12.	Ok	Ok	35.	4.	0.	0.	0.	39.06	1.			0.	1.	1.	1.		3.	155.		120.	1 Except affected teat	1.	Quarter	3.		2.	2.	2.	Kg	2.	10.	10.	1.	1.					2.	1	0.	1.	0.
20.	22.	Gondar	Alem Tegegne	4.	8.	12.	Ok	Ok	25.	10.	0.	0.	12.	47	1.			0.	1.	2.	2.		2.		50.	180.	1 Except affected teat	1.	Quarter	5.			2.	3.	Kg	3.	7.	7.		0.					2.	2	0.	1.	0.
21.	23.	Gondar	Achenef Tebeje	16.	10.	12.	Ok	Ok	35.	3.	7.	0.	4.	49.620000000000005	3.	300.	600.	900.	0.	0.	0.		2.			120.																			5.	3	2.	2.	0.
22.	24.	Gondar	Amare Degu	16.	12.	13.	Ok	Ok	25.	3.	0.	0.	10.	37.659999999999997	3.	400.	1000.	1400.	1.	2.	2.		2.		60.	60.	1 Except affected teat	1.	Quarter	3.		1.	2.	0.5	P	0.	3.	3.	1.	1.	1,2	3.			16.	6	5.	3.	5.
23.	25.	Gondar	Ayenew	11.	10.	12.	Ok	Ok	10.	0.	8.	0.	38.	56	3.	300.	400.	700.	0.	0.	0.		2.																						1.	1	0.	1.	0.
24.	26.	Gondar	Wubalem Maralem	5.	9.	12.	Ok	Ok	30.	0.	10.	0.	9.	49	1.			0.	0.	0.	0.		2.			30.																			1.	1	0.	0.	0.
25.	27.	Gondar	Kiflitu Abebe	9.	9.	12.	Ok	Ok	10.	4.	0.	0.	9.	23.07	3.	250.	900.	1150.	1.	1.	1.		2.		30.		1 Except affected teat	1.	Quarter	5.				1.	Kg	1.	30.	30.	1.	0.	1,4				6.	1	0.	0.	0.
26.	28.	Gondar	Tiru Yeshanew	6.	12.	14.	Ok	Ok	15.	0.	12.	0.	0.	27	3.	100.	400.	500.	0.	0.	0.		2.																						2.	1	0.	0.	0.
27.	29.	Gondar	Tefera	20.	8.	12.	Ok	Ok	12.	9.	0.	0.	4.	25	3.	200.	600.	800.	1.	3.	3.		3.	100.		90.	1 Except affected teat	1.	Quarter	6.			2.	0.	Kg	0.	15.	15.	1.	1.	1.				8.	3	1.	3.	1.
28.	30.	Gondar	Tsegaye Yihunie	10.	10.	12.	Ok	Ok	20.	7.	0.	0.	6.	33.25	2.	150.	1000.	1150.	1.	2.	2.		2.		50.	60.	1 Except affected teat	1.	Quarter	5.		3.	1.	0.	Kg	0.	7.	7.	1.	1.	4.				4.	3	4.	0.	2.
29.	31.	Gondar	Birhane Tewabe	14.	8.	12.	Ok	Ok	14.	3.	0.	0.	27.	43.7	3.		3000.	3000.	1.	2.	2.		2.		80.		1 Except affected teat	1.	Quarter	5.		4.	2.	0.5	P	0.	15.	15.	1.	1.		1.	15000.	31000.	24.	7	5.	2.	0.
30.	32.	Gondar	Abush	16.	10.	10.	Ok	Ok	17.	9.	0.	0.	4.	30.5	3.	400.	600.	1000.	1.	1.	1.		1.	70.	80.		1 Except affected teat	1.	Quarter	4.		3.	2.	0.5	P	0.	7.	7.	1.	1.	4.				11.	4	0.	3.	1.
31.	33.	Gondar	Zewudu beyene	12.	8.	13.	Ok	Ok	60.	0.	4.	0.	9.	73	3.			0.	0.	0.	0.		4.			60.						2.		0.5						1.	4.				6.	1	0.	0.	0.
32.	34.	Gondar	Aynalem G/selassie	11.	10.	8.	Ok	Ok	17.	5.	6.	0.	4.	32.71	2.	300.		300.	1.	1.	1.	30.	2.		180.		0.	0.	Cow		5.	2.	2.	2.	Kg	2.	7.	7.	1.	0.					7.	2	2.	1.	0.
33.	35.	Gondar	Tigabalem	11.	12.	12.	Ok	Ok	15.	15.	4.	0.	14.	48	1.			0.	1.	1.	1.		2.		120.		0.	0.	Cow		5.			2.	Kg	2.	15.	15.							3.	2	0.	0.	0.
34.	36.	Gondar	Degu muche	12.	11.	10.	Ok	Ok	10.	4.	0.	0.	20.	34.44	3.	200.	800.	1000.	0.	0.	0.	75.	1.			240.						4.	1.	1.						1.	2.				3.	3	1.	1.	1.
35.	37.	Gondar	Zemetu	10.	6.	12.	Ok	Ok	12.	9.	0.	0.	15.	36.159999999999997	1.			0.	0.	0.	0.		1.																						3.	2	1.	0.	1.
36.	39.	Gondar	Alemtsehay Melese	12.	17.	12.	Ok	Ok	20.	5.	0.	0.	10.	35	1.			0.	0.	0.	0.		1.									4.	1.	2.						1.	1,2	1.	8000.	10000.	3.	1	1.	1.	0.
37.	40.	Gondar	Marie Meles	11.	10.	10.	Ok	Ok	17.	8.	0.	0.	14.	38.43	1.			0.	0.	0.	0.		1.			120.														0.					3.	1	0.	0.	0.
38.	41.	Gondar	Araya Kidane	12.	10.	12.	Ok	Ok	17.	8.	0.	0.	22.	47.93	1.			0.	1.	2.	4.		2.		80.		1 Except affected teat	1.	Quarter	1.		1.	2.	4.	Kg	7.	3.	3.	0.	1.	1.	3.			5.	2	0.	1.	0.
39.	42.	Gondar	Tegegnu Teferi	12.	20.	10.	Ok	Ok	30.	4.	0.	0.	8.	41.6	2.	400.	400.	800.	0.	0.	0.		2.			60.						1.	2.	3.						1.	1.				2.	2	2.	1.	0.
40.	43.	Gondar	Ambachew	6.	10.	12.	Ok	Ok	15.	11.	0.	0.	25.	50.8	1.			0.	0.	0.	0.		1.									1.	2.	2.						0.					2.	1	0.	1.	0.
41.	44.	Gondar	Ayal Wale	17.	13.	12.	Ok	Ok	17.	0.	16.	0.	45.	78.430000000000007	1.			0.	1.	1.	1.		1.	120.	80.		1 Except affected teat	1.	Quarter	5.			2.	2.	Kg	2.	30.	30.	1.	0.					6.	3	1.	2.	0.
42.	45.	Gondar	Fiseha Abate	8.	12.	10.	Ok	Ok	15.	6.	11.	0.	7.	38.85	1.			0.	1.	1.	1.		4.		60.		1 Except affected teat	1.	Quarter	3.		1.	1.	1.	Kg	1.	4.	4.	1.	0.					8.	5	3.	4.	1.
43.	46.	Gondar	Worku mekonnen	22.	10.	10.	Ok	Ok	7.	4.	0.	0.	15.	25.6	3.	400.	1200.	1600.	1.	1.	2.		1.	100.	60.		1 Except affected teat	1.	Quarter	4.		2.	1.	1.	Kg	1.	3.	3.	1.	0.					5.	1	0.	1.	0.
44.	47.	Gondar	Berhe Haile	21.	10.	9.	Ok	Ok	24.	2.	5.	0.	4.	35.43	2.	500.	750.	1250.	0.	0.	0.		4.										1.	2.						1.	5.				10.	4	1.	1.	1.
45.	48.	Gondar	Tiget Mekonnen	10.	8.	10.	Ok	Ok	5.	4.	10.	0.	15.	33.549999999999997	3.	300.	300.	600.	1.	2.	2.	30.	2.		45.	120.	1 Except affected teat	1.	Quarter	5.		2.	2.	1.	Kg	1.	7.	7.	1.	1.	1.	2.			3.	2	0.	0.	0.
46.	49.	Gondar	Zewudu Hailu	11.	9.	11.	Ok	Ok	10.	5.	0.	0.	2.	16.55	1.			0.	0.	0.	0.		4.			60.							2.	7.						0.					3.	2	1.	1.	0.
47.	50.	Gondar	Endalew Bitew	7.	9.	12.	Ok	Ok	20.	20.	0.	0.	12.	52	3.	200.	900.	1100.	1.	2.	3.	15.	2.		70.	60.	1 Except affected teat	1.	Quarter	6.		4.	2.	3.	Kg	3.	5.	5.	1.	1.	4.	1.	11000.	35000.	8.	2	2.	0.	0.
48.	51.	Gondar	Atinkut Kassie	14.	11.	12.	Ok	Ok	20.	0.	12.	0.	10.	42	3.	600.	800.	1400.	1.	3.	3.	20.	4.		80.		1 Except affected teat	1.	Quarter	7.		2.	2.	0.25	P	0.	90.	90.	1.	1.	2,5				5.	1	0.	0.	0.
49.	52.	Gondar	Mekashaw Abate	11.	8.	12.	Ok	Ok	35.	0.	0.	0.	15.	50	1.			0.	1.	1.	1.		2.		130.		1 Except affected teat	1.	Quarter	4.		3.	1.	0.5	P	0.	10.	10.	1.	0.					1.	1	0.	0.	0.
50.	53.	Gondar	Adane Kebede	8.	8.	14.	Ok	Ok	30.	0.	24.	0.	4.	58	3.	400.	450.	850.	0.	0.	0.		1.										2.	4.						0.					2.	1	0.	0.	0.
51.	54.	Gondar	Gedamu Degu	12.	9.	11.	Ok	Ok	5.	3.	0.	0.	10.	18	2.	1000.		1000.	1.	1.	1.		1.	200.			1 Except affected teat	1.	Quarter	3.		1.	2.	0.5	P	0.	15.	15.	1.	1.	6.				5.	9	2.	0.	1.
52.	55.	Gondar	Ato Amsalu	11.	9.	12.	Ok	Ok	15.	0.	0.	0.	26.	41	3.	400.	600.	1000.	1.	1.	1.		2.		40.	90.	1 Except affected teat	1.	Quarter	5.		1.	1.	1.	Kg	1.	15.	15.	1.	0.					4.	2	0.	1.	0.
53.	56.	Gondar	Alemayehu	6.	8.	10.	Ok	Ok	10.	0.	0.	0.	13.	23	1.			0.	1.	1.	1.		2.		100.	90.	1 Except affected teat	1.	Quarter	3.		1.	1.	0.	Kg	0.	Forever	240.	0.	0.					5.	2	1.	0.	0.
54.	57.	Gondar	Mulu Moges	8.	7.	14.	Ok	Ok	20.	0.	24.	0.	24.	68	3.		500.	500.	0.	0.	0.		1.																						1.	1	0.	0.	0.
55.	59.	Gondar	Alebachew Gola	5.	10.	12.	Ok	Ok	10.	0.	11.	0.	16.	37	1.			0.	0.	0.	0.		2.										2.	2.						0.	5.				1.	1	0.	0.	0.
56.	60.	Gondar	Bogale	10.	8.	12.	Ok	Ok	5.	0.	10.	0.	10.	25	2.	200.	500.	700.	1.	1.	1.		1.	250.			0.	0.	Cow		3.	3.	1.	2.	Kg	2.	7.	7.	1.	1.	2.				6.	3	0.	2.	1.
57.	61.	Gondar	Mulugeta	7.	10.	12.	Ok	Ok	10.	0.	10.	0.	13.	33	1.			0.	1.	1.	1.		2.		100.	180.	1 Except affected teat	1.	Quarter	5.		1.	1.	0.	Kg	0.	7.	7.	1.	0.					2.	1	1.	2.	0.
58.	62.	Gondar	10 Aleka Sisay	10.	12.	10.	Ok	Ok	10.	0.	14.	0.	24.	48	3.	300.		300.	1.	1.	1.		2.		75.		1 Except affected teat	1.	Quarter	5.		3.	2.	3.	Kg	3.	7.	7.	1.	0.					4.	4	2.	1.	0.
59.	63.	Gondar	Aba Kefyalew	11.	12.	12.	Ok	Ok	0.	0.	0.	0.	30.	30	1.			0.	1.	2.	2.		1.	150.			1 Except affected teat	1.	Quarter	3.				1.	Kg	1.	15.	15.							10.	7	3.	2.	0.
60.	64.	Gondar	Abebe Legesse	19.	10.	11.	Ok	Ok	0.	4.	7.	0.	14.	24.8	1.			0.	1.	1.	1.		1.	160.			0.	0.	Cow		3.	2.	2.	3.	Kg	3.	15.	15.	1.	1.			6500.	24700.	9.	3	2.	2.	1.
61.	65.	Gondar	Gashaw Ayehu	22.	12.	11.	Ok	Ok	10.	10.	4.	0.	15.	39	3.	2000.		2000.	1.	5.	10.		4.		100.		0.	0.	Cow		3.	2.	2.	0.33333333333333331	P	0.	3.	3.	1.	0.					25.	8	4.	1.	0.
62.	66.	Gondar	Metafet Abtew	20.	14.	11.	Ok	Ok	5.	10.	4.	0.	24.	43	2.	400.	600.	1000.	1.	2.	4.	30.	4.		60.	120.	1 Except affected teat	1.	Quarter	5.		3.	2.	2.	Kg	2.	4.	4.		0.					3.	3	3.	1.	0.
63.	67.	Gondar	Bewket Gedamu	14.	12.	10.	Ok	Ok	30.	0.	0.	0.	30.	60	2.	950.		950.	1.	4.	4.		4.		80.		1 Except affected teat	1.	Quarter	5.		1.	3.	2.	Kg	2.	5.	5.	1.	0.					15.	7	4.	0.	1.
64.	68.	Gondar	Dinknesh Tesfaye	8.	12.	10.	Ok	Ok	15.	0.	0.	0.	15.	30	2.	500.	1500.	2000.	1.	1.	1.	30.	2.		80.		0.	0.	Cow		6.		2.	0.5	P	0.	15.	15.	1.	0.					5.	2	1.	2.	1.
65.	69.	Gondar	Maralem Kasegn	5.	5.	12.	Ok	Ok	17.	7.	0.	10.	0.	34.33	2.	500.		500.	0.	0.	0.		3.										1.	1.5											4.	4	0.	0.	2.
66.	70.	Gondar	Haylemariam Worku	14.	9.	12.	Ok	Ok	35.	0.	7.	0.	4.	46	2.	400.	500.	900.	1.	1.	1.	20.	2.		145.		1 Except affected teat	1.	Quarter	3.		4.	2.	0.5	P	0.	14.	14.	1.	0.					9.	3	1.	0.	2.
67.	71.	Gondar	Maru Frew/Elsa	8.	8.	14.	Ok	Ok	10.	0.	8.	0.	10.	28	1.			0.	1.	1.	1.		2.		75.		1 Except affected teat	1.	Quarter	5.				1.	Kg	1.	3.	3.							2.	1	0.	0.	0.
68.	72.	Gondar	Ferede Enyew	18.	8.	11.	Ok	Ok	10.	9.	0.	0.	12.	30.84	2.	500.	1000.	1500.	1.	3.	6.		4.		60.		1 Except affected teat	1.	Quarter	6.		2.	2.	3.	Kg	3.	15.	15.	1.	0.					7.	4	0.	1.	0.
69.	73.	Gondar	Ayelgn Takele	8.	6.	10.	Ok	Ok	20.	6.	0.	0.	14.	39.67	1.			0.	0.	0.	0.		2.			120.																			3.	2	1.	1.	1.
70.	74.	Gondar	Tibebu Tegegne	18.	7.	12.	Ok	Ok	10.	3.	0.	0.	30.	43.15	1.			0.	0.	0.	0.	100.	1.			180.							2.	0.5						0.					17.	1	0.	0.	0.
71.	75.	Gondar	Getahun Mengistu	7.	8.	12.	Ok	Ok	15.	0.	6.	4.	4.	29	3.	200.	900.	1100.	0.	0.	0.	15.	2.			60.						4.	2.	0.5						1.	3.	1.	11000.	35000.	8.	3	0.	0.	0.
72.	76.	Gondar	Tesfaye Alamrew	18.	9.	14.	Ok	Ok	15.	30.	0.	0.	18.	63	1.			0.	0.	0.	0.		1.										1.	0.5						0.					4.	1	0.	0.	0.
73.	77.	Gondar	Kes Yemane Birhan	9.	7.	11.	Ok	Ok	20.	7.	0.	0.	9.	35.700000000000003	1.			0.	0.	0.	0.		1.									1.	0.							0.					4.	2	0.	0.	1.
74.	78.	Gondar	Emuhay Asfaw	9.	18.	12.	Ok	Ok	6.	4.	4.	0.	4.	19	1.			0.	1.	1.	1.		1.	300.			1 Except affected teat	1.	Quarter	3.		4.	2.	3.	Kg	3.	5.	5.	1.	0.	Breeding problem				3.	1	0.	0.	0.
75.	79.	Gondar	Tigabu Alemu	8.	11.	14.	Ok	Ok	5.	5.	0.	0.	9.	18.7	2.	140.	500.	640.	0.	0.	0.		2.			60.						3.	1.	0.75						1.	1.				5.	3	2.	2.	1.
76.	80.	Gondar	Yitbarek Birhan	15.	10.	10.	Ok	Ok	10.	7.	0.	0.	20.	37.200000000000003	2.	400.	1200.	1600.	1.	1.	1.		2.		100.		1 Except affected teat	1.	Quarter	4.		4.	2.	0.5	P	0.	7.	7.	1.	0.					5.	2	0.	0.	0.
77.	81.	Gondar	Welelaw abeje	10.	8.	9.	Ok	Ok	17.	7.	0.	10.	0.	34.33	2.	300.		300.	0.	0.	0.		1.										2.	2.											4.	3	0.	1.	1.
78.	85.	Gondar	Enanu Ayele	9.	13.	10.	Ok	Ok	25.	0.	0.	0.	25.	50	1.			0.	1.	1.	1.		2.		100.		1 Except affected teat	1.	Quarter	6.		4.	2.	0.5	P	0.	Forever	390.	0.						2.	1	0.	0.	0.
79.	86.	Gondar	Marie Guadie	10.	10.	13.	Ok	Ok	20.	8.	0.	0.	14.	41	2.	200.		200.	0.	0.	0.		1.																						4.	4	1.	2.	0.
80.	87.	Gondar	Lulu Fentahun	9.	11.	10.	Ok	Ok	25.	11.	0.	0.	6.	41.32	2.	1600.		1600.	0.	0.	0.		3.									3.	2.	1.5						0.	3.				3.	3	1.	1.	0.
81.	88.	Gondar	Asefa Ferede	9.	8.	10.	Ok	Ok	20.	5.	16.	0.	28.	68.5	2.	1000.	2000.	3000.	0.	0.	0.		2.			120.						4.	2.	0.5						1.	1.	1.	12000	35000	22	3	2.	1.	0.
82.	89.	Gondar	Hailay Girmay	8.	8.	12.	Ok	Ok	5.	13.	0.	0.	23.	41.3	1.			0.	0.	0.	0.		1.										2.	0.5						0.					4.	3	0.	3.	1.
83.	90.	Gondar	Dibaka Bahru	10.	16.	12.	Ok	Ok	20.	0.	0.	0.	50.	70	3.	150.		150.	0.	0.	0.		1.										1.	0.25						1.	Milk yield				3.	1	2.	1.	0.
84.	91.	Gondar	Gash Gedlu	17.	10.	12.	Ok	Ok	50.	5.	16.	0.	16.	86.7	3.	800.	1500.	2300.	1.	2.	2.		1.	500.			0.	0.	Cow		3.	For Butter	3.	0.6	P	1.	Forever	300.	0.	0.					15.	4	0.	0.	0.
85.	92.	Gondar	Tesfa Bezabih	9.	10.	12.	Ok	Ok	17.					17.43	2.	300.		300.	1.	1.	1.		1.	100.			1 Except affected teat	1.	Quarter	5.				2.	Kg	2.	30.	30.							3.	2	1.	2.	0.
86.	93.	Gondar	Yalew Asefa	14.	10.	12.	Ok	Ok	25.	9.	0.	0.	10.	44	2.	350.	900.	1250.	1.	2.	2.		1.	200.			0.	0.	Cow		3.		3.	0.5	P	0.	10.	10.	1.	1.		1.	17000	30000	5	2	1.	0.	0.
87.	94.	Gondar	10 Aleka Yeshwa/Fenta Alene	8.	8.	14.	Ok	Ok	10.	6.	0.	0.	35.	50.6	2.	200.	700.	900.	0.	0.	0.		2.			120.																			3.	2	0.	0.	0.
88.	95.	Gondar	Mulugeta Tamrie	10.	9.	14.	Ok	Ok	20.	0.	12.	0.	43.	75	1.			0.	0.	0.	0.	40.	2.			60.																			2.	1	0.	0.	0.
89.	97.	Gondar	Aklew melkamie	4.	9.	14.	Ok	Ok	20.	0.	15.	10.	10.	55	3.	400.	1500.	1900.	1.	2.	2.		3.	100.	20.		0.	0.	Cow		1.		2.	2.	Kg	2.	3.	3.	1.	0.					2.	1	0.	0.	0.
90.	1.	BD	Maledu melese	7.	12.	12.	1400.	2.	15.	7.	6.	0.	15.	43	1.			0.	1.	1.	2.	20.	3.	150.	70.	60.	1 Except affected teat	1.	Quarter	4.		3.	2.	4.	Kg	4.	Forever	360.	0.	0.					1.	1	0.	0.	0.
91.	5.	BD	Maralem Adugna	7.	8.	12.	1500.		0.	8.	7.	0.	9.	24	1.			0.	1.	2.	2.		2.		40.	120.	1 Except affected teat	1.	Quarter	5.		3.	2.	0.5	P	0.	Forever	255.	0.	1.	1.	1.	8000.	22000.	2.	1	0.	0.	1.
92.	9.	BD	Balew Fenta	6.	12.	10.	1000.	2.	15.	8.	8.	3.	4.	37.5	1.			0.	1.	1.	1.		2.		18.		1 Except affected teat	1.	Quarter	5.		1.	1.	0.	Kg	0.	15.	15.	1.	0.					3.	2	0.	0.	0.
93.	11.	BD	Wondale Yeshaneh	9.	10.	12.	1200.	1 shekim	30.	9.	10.	0.	0.	49.25	1.			0.	1.	1.	1.		2.		36.	120.	0.	0.	Cow		2.		1.	1.	Kg	1.	7.	7.	1.	0.					4.	1	2.	1.	0.
94.	12.	BD	Girma Wassie	11.	11.	8.	1100.	0.5 shekim	15.	8.	9.	2.	8.	42.5	1.			0.	1.	2.	2.		3.	80.	30.	40.	1 Except affected teat	1.	Quarter	4.		3.	2.	3.	Kg	3.	Forever	330.	0.	0.					4.	3	2.	1.	0.
95.	14.	BD	Muluken Limenih	12.	13.	12.	950.		0.	6.	6.	0.	8.	20.3	3.	500.	500.	1000.	1.	1.	2.		3.	46.	60.	20.	1 Except affected teat	1.	Quarter	6.		3.	2.	2.	Kg	2.	15.	15.	1.	1.	1.		11000.	16000.	3.	3	1.	0.	0.
96.	16.	BD	Abeje Sendek	7.	12.	12.	1050.		0.	9.	24.	8.	4.	43.85	1.			0.	1.	1.	1.		1.	200.		45.	1 Except affected teat	1.	Quarter	15.			2.	2.	Kg	2.	Forever	360.	0.	0.					2.	2	1.	1.	0.
97.	17.	BD	Minishal Tefera	5.	9.	12.	1000.		0.	0.	0.	0.	0.	0	1.			0.	1.	1.	2.		2.		51.	120.	1 Except affected teat	1.	Quarter	4.		1.	2.	5.	Kg	2.	15.	15.	0.	1.	1.	1.	11000.	18000.	3.	1	0.	0.	0.
98.	19.	BD	Cherie Wale	8.	11.	10.	1200.		0.	9.	7.	0.	0.	16.25	3.	300.	400.	700.	1.	2.	2.		2.		60.	100.	1 Except affected teat	1.	Quarter	6.		3.	1.	0.	Kg	0.	Forever	330.	0.	0.					7.	5	1.	0.	1.
99.	20.	BD	Agegn Guadie	7.	10.	12.	1000.	1 shekim	30.	6.	7.	0.	8.	50.7	1.			0.	1.	1.	2.		1.	50.	60.		1 Except affected teat	1.	Quarter	4.		3.	1.	2.	Kg	2.	5.	5.		0.					3.	1	0.	0.	0.
100.	23.	BD	Birhanu Kassie	16.	12.	9.	1000.	1.	8.	6.	18.	0.	0.	31.5	2.	850.	0.	850.	1.	2.	2.		2.		51.		1 Except affected teat	1.	Quarter	5.				3.	Kg	3.	3.	3.							6.	3	1.	1.	0.
101.	25.	BD	Shambel Ayalew	10.	12.	9.	1000.	1 shekim	30.	10.	10.	0.	5.	54.2	3.	400.	400.	800.	1.	3.	3.		1.	105.			1 Except affected teat	1.	Quarter	5.				2.	Kg	2.	7.	7.							10.	4	1.	3.	2.
102.	28.	BD	Awoke Aschenek	6.	15.	8.	1000.	2.	15.	7.	10.	0.	9.	41.3	1.			0.	1.	1.	1.		1.	70.	80.		0.	0.	Cow		5.		1.	1.	Kg	1.	5.	5.	1.	0.					4.	2	0.	0.	0.
103.	36.	BD	Gebru Sendek	8.	10.	12.	1000.	2.	15.	10.	10.	0.	15.	51	1.			0.	1.	1.	1.	30.	2.		34.	120.	1 Except affected teat	1.	Quarter	4.		1.	2.	0.	Kg	0.	Forever	285.	0.	0.					3.	3	1.	0.	0.
104.	37.	BD	Birhanu Simegnew	6.	10.	12.	600.	1 shekim	30.	0.	11.	0.	15.	55.8	1.			0.	1.	2.	2.		2.		75.	150.	1 Except affected teat	1.	Quarter	5.		4.	1.	2.	Kg	2.	15.	15.	1.	0.					37.	3	0.	1.	0.
105.	40.	BD	Wolelaw Sendek	8.	10.	12.	700.		0.	8.	6.	0.	0.	14	1.			0.	1.	1.	4.	30.	2.		15.	80.	1 Except affected teat	1.	Quarter	5.		1.	2.	1.	Kg	1.	15.	15.	0.	0.					4.	1	0.	0.	1.
106.	43.	BD	Yeshambel Getnet	8.	16.	12.	800.	1 shekim	30.	8.	6.	0.	14.	58.4	1.			0.	1.	2.	4.	50.	2.		38.	120.	1 Except affected teat	1.	Quarter	4.		3.	3.	1.	Kg	1.	15.	15.	1.	0.					4.	2	0.	2.	0.
107.	47.	BD	Alemayehu Dagne	13.	14.	9.	1000.		6.	0.	0.	0.	0.	6	3.	1550.	0.	1550.	1.	3.	3.		1.	105.			1 Except affected teat	1.	Quarter	7.				2.	Kg	2.	30.	30.							27.	9	4.	6.	2.
108.	53.	BD	Shambel Bulad	12.	11.	9.	1000.	1.	8.	9.	12.	0.	21.	49.5	3.	1000.	0.	1000.	1.	3.	6.		1.	105.			1 Except affected teat	1.	Quarter	3.				2.	Kg	2.	7.	7.							10.	7	1.	5.	2.
109.	59.	BD	Minichil Melese	10.	13.	9.	920.	0.5 shekim	15.	10.	9.	3.	9.	45.6	1.			0.	1.	1.	1.		1.	300.			1 Except affected teat	1.	Quarter	15.		2.	2.	4.	Kg	4.	15.	15.	0.	1.	6.				10.	6	4.	2.	0.
110.	2.	BD	Worku Biwota	8.	9.	12.	1400.	2.	15.	12.	10.	0.	2.	40.	1.			0.	0.	0.	0.		2.		100.	100.	1.	1.	Quarter			1.	0.						1.	0.						2.	2.	0.	0.
111.	3.	BD	Sifrash beyene	5.	13.	10.	1200.	0.	4.	0.	13.	0.	4.	21.	1.			0.	0.	0.	0.		2.		51.			1.	Quarter							0.										1.	0.	0.	0.
112.	4.	BD	Bitewlign Mesfin	6.	11.	12.	1400.	1.	8.	0.	13.	0.	4.	24.	1.			0.	0.	0.	0.		2.		51.			1.	Quarter																	1.	0.	1.	1.
113.	6.	BD	Zemene Lulie	7.	10.	10.	965.		0.	0.	0.	0.	0.	41.	1.			0.	0.	0.	0.		2.		30.	80.	1.	1.	Quarter			1.	2.	4.	Kg			15.	1.	1.	4.					2.	1.	2.	0.
114.	7.	BD	Ayenew Demissie	7.	11.	12.	1200.		0.	7.	7.	0.	9.	23.	1.			0.	0.	0.	0.		2.		51.			1.	Quarter				0.						1.	0.						1.	0.	0.	0.
115.	8.	BD	Getaye Admas	11.	14.	12.	1300.	0.5 shekim	15.	8.	12.	0.	5.	40.	1.			0.	0.	0.	0.		2.		51.			1.	Quarter																	2.	1.	1.	1.
116.	10.	BD	Tadele Manale	7.	9.	15.	1000.		0.	3.	12.	0.	0.	15.	1.			0.	0.	0.	0.		2.		51.			1.	Quarter							3.										2.	0.	1.	0.
117.	13.	BD	Kebede Mengesha	9.	12.	12.	1200.	1 shekim	30.	14.	13.	0.	0.	56.	1.			0.	0.	0.	0.		3.	50.	20.	30.	0.	1.	Quarter				2.	we did not milk the mastatic quarter				15.		0.						3.	0.	0.	0.
118.	15.	BD	Ager Yeshanew	6.	14.	10.	1000.	1 shekim	30.	10.	10.	0.	0.	51.	1.			0.	0.	0.	0.		2.		51.		1.	1.	Quarter			3.	2.	0.	Kg	2.		15.	1.	0.						1.	1.	0.	0.
119.	18.	BD	Mergeta Bayle	7.	12.	10.	900.		0.	0.	0.	0.	0.	41.	2.	600.	700.	1300.	0.	0.	0.		1.	120.	25.		0.	1.	Quarter				2.	they donot need to milking				15.	0.	0.						3.	0.	0.	0.
120.	21.	BD	Gedefaw Eshetie	6.	13.	12.	900.	2.	15.	0.	0.	0.	15.	30.	1.			0.	0.	0.	0.		1.	60.			1.	1.	Quarter			3.	2.	2.	Kg			15.	1.	0.						3.	0.	1.	0.
121.	22.	BD	Mamo Fenta	6.	12.	12.	1000.	3.	22.	4.	6.	0.	14.	47.	3.	334.		334.	0.	0.	0.		1.	30.				1.	Quarter				1.						1.	0.						1.	0.	0.	0.
122.	24.	BD	Kes Asfaw	11.	10.	9.	1000.	0.	4.	6.	18.	0.	0.	28.	1.			0.	0.	0.	0.		1.	105.				1.	Quarter																	5.	0.	1.	2.
123.	26.	BD	Aysheshim Belayneh	10.	9.	12.	800.	0.5 shekim	15.	10.	9.	4.	5.	43.	1.			0.	0.	0.	0.		1.	200.				1.	Quarter																	2.	0.	0.	0.
124.	27.	BD	Aychew Sisay	10.	8.	9.	600.	0.25 shekim	8.	8.	14.	3.	15.	47.	1.			0.	0.	0.	0.		1.	150.				1.	Quarter																	1.	1.	1.	0.
125.	29.	BD	Atinkut Amogne	4.	12.	12.	900.	1 shekim	30.	7.	7.	0.	19.	63.	1.			0.	0.	0.	0.		1.	70.				1.	Quarter				0.						1.	0.						1.	0.	0.	0.
126.	30.	BD	Tsegaye Mihret	12.	10.	9.	1000.	2.	15.	8.	22.	0.	10.	54.	3.	800.	800.	1600.	1.	1.	1.		1.	105.	65.			1.	Quarter	3.				0.	Kg	0.	60.	60.								9.	6.	4.	0.
127.	31.	BD	Tilahun Melaku	13.	8.	9.	1000.		0.	0.	0.	0.	0.	41.	2.	800.	0.	800.	0.	0.	0.		1.	105.				1.	Quarter																	2.	2.	1.	0.
128.	32.	BD	Bizualem Ayalew	12.	15.	9.	650.	0.5 shekim	15.	6.	12.	0.	3.	36.	3.	150.		150.	1.	1.	1.		1.	105.	60.			1.	Quarter	3.				1.	Kg	1.	10.	10.								5.	3.	2.	0.
129.	33.	BD	Eyayu Workie	16.	11.	9.	1000.	0.	15.	7.	4.	0.	4.	30.	3.	800.	0.	800.	0.	0.	0.		1.	105.				1.	Quarter																	2.	0.	0.	0.
130.	34.	BD	Agerie Yalew	9.	13.	9.	1000.	0.5 shekim	15.	9.	8.	0.	4.	36.	1.			0.	0.	0.	0.		1.	105.				1.	Quarter							0.										3.	2.	1.	0.
131.	35.	BD	Kidanie Kebede	12.	11.	9.	1200.	0.25 shekim	8.	9.	10.	0.	7.	34.	2.	700.	0.	700.	0.	0.	0.		1.	105.				1.	Quarter																	3.	0.	2.	0.
132.	38.	BD	Yaregal Tadele	6.	16.	12.	1000.	1 shekim	30.	8.	7.	0.	9.	54.	1.			0.	0.	0.	0.		2.		60.			1.	Quarter				0.			1.			1.	0.						1.	0.	0.	0.
133.	39.	BD	Wassie Endalamaw	8.	16.	10.	1000.	1 shekim	30.	0.	7.	0.	10.	47.	3.	400.		400.	0.	0.	0.	20.	2.		30.		1.	1.	Quarter			3.	0.						1.	0.						1.	0.	0.	1.
134.	41.	BD	Abate Kebede	7.	10.	10.	1000.	1 shekim	30.	8.	7.	0.	12.	56.	3.	800.	400.	1200.	0.	0.	0.		2.		25.	140.	1.	1.	Quarter			4.	0.						1.	0.						2.	0.	1.	0.
135.	42.	BD	Mulugeta Awudie	8.	8.	12.	800.	1 shekim	30.	7.	7.	0.	14.	58.	1.			0.	0.	0.	0.		2.		100.			1.	Quarter				1.						1.	0.						1.	0.	0.	0.
136.	44.	BD	Ayalew Gedif	13.	9.	9.	1000.		0.	0.	0.	0.	0.	41.	1.			0.	0.	0.	0.		2.		51.			1.	Quarter																	1.	0.	0.	0.
137.	45.	BD	Yitbarek G/Egziabhere	16.	12.	12.	700.	0.5 shekim	15.	12.	10.	0.	4.	42.	2.	400.	400.	800.	0.	0.	0.		1.	60.			1.	1.	Quarter			3.	2.	3.	Kg			15.	1.	1.	1.	1.		24000.		5.	1.	0.	0.
138.	46.	BD	Tigabu Misganaw	9.	12.	9.	1000.		0.	0.	0.	0.	50.	50.	1.			0.	0.	0.	0.		1.	105.				1.	Quarter																	5.	0.	3.	4.
139.	48.	BD	Zeritu Bizuye	10.	12.	12.	800.	0.5 shekim	15.	8.	13.	0.	7.	43.	2.	500.	500.	1000.	0.	0.	0.		1.	120.			0.	1.	Quarter				2.	6.	Kg				1.	0.						6.	1.	5.	3.
140.	49.	BD	Muluken Honelign	7.	10.	10.	500.	0.5 shekim	15.	6.	10.	0.	6.	38.	2.	700.	500.	1200.	0.	0.	0.		1.	50.			1.	1.	Quarter			4.	2.	8.	Kg			15.	0.	0.						2.	0.	0.	0.
141.	50.	BD	Endalew Mola	7.	12.	10.	950.	1.	8.	9.	7.	0.	7.	31.	2.	800.	0.	800.	0.	0.	0.		1.	105.				1.	Quarter				1.						1.	0.						3.	1.	0.	0.
142.	51.	BD	Balew Yanteneger	17.	9.	9.	1100.	1.	8.	9.	13.	9.	16.	55.	2.	1375.	0.	1375.	0.	0.	0.		1.	105.				1.	Quarter																	14.	2.	2.	0.
143.	52.	BD	Tefared Adamu	15.	16.	12.	1000.		10.	20.	20.	0.	10.	60.	2.		0.	0.	0.	0.	0.		1.	105.				1.	Quarter																	3.	3.	4.	0.
144.	54.	BD	Yabezal Geremew	15.	10.	12.	750.	1.	8.	9.	13.	0.	14.	43.	2.	1000.	0.	1000.	1.	1.	1.		1.	105.	60.			1.	Quarter					1.	Kg	1.	30.	30.								9.	2.	4.	1.
145.	55.	BD	Muchit Alemu	8.	8.	10.	1000.		0.	0.	0.	0.	0.	41.	1.			0.	0.	0.	0.		2.		51.			1.	Quarter																	1.	2.	1.	0.
146.	56.	BD	Kindalem Tadesse	12.	11.	9.	700.	0.	8.	8.	10.	0.	10.	36.	2.	500.	0.	500.	0.	0.	0.		2.		51.			1.	Quarter																	1.	0.	0.	0.
147.	57.	BD	Anchinesh Tesfa	10.	12.	8.	1000.	2.	15.	9.	12.	6.	2.	44.	3.	500.	0.	500.	1.	2.	2.		1.	105.	150.			1.	Quarter	3.			2.	3.	Kg	3.	15.	15.	1.	0.						3.	0.	1.	2.
148.	58.	BD	Yirgedu Demilew	12.	10.	9.	750.	2.	15.	12.	12.	0.	9.	48.	1.			0.	0.	0.	0.		1.	105.				1.	Quarter				2.	2.	Kg				1.	0.						2.	0.	1.	0.
149.	60.	BD	Admassu Kassa	14.	10.	9.	1250/animal	0.25 shekim	5.	6.	9.	3.	12.	35.	2.	3200.	0.	3200.	1.	1.	1.		1.	105.	50.			1.	Quarter	5.				0.	Kg	0.	30.	30.								17.	8.	9.	4.
150.	61.	BD	Samrawit Dagnew	5.	7.	12.									1.			0.	0.	0.	0.		1.	200.			1.	1.	Quarter				2.	1.	Kg	1.		30.	0.	0.						2.	0.	0.	1.
[truncated: 127 more columns]
